# Supplementary material for: Domain analysis reveals striking functional differences between the regulatory subunits of phosphatidylinositol 3-kinase (PI3K), p85α and p85β
Source: PubMed Central journal article supplement (PMC5593529; doi:10.18632/oncotarget.19866), 2017-08-03
Supplement: oncotarget-08-55863-s001.pdf [file oncotarget-08-55863-s001.pdf]

# Domain analysis reveals striking functional differences between the regulatory subunits of phosphatidylinositol 3-kinase (PI3K), p85 $\alpha$ and p85 $\beta$

## SUPPLEMENTARY MATERIALS

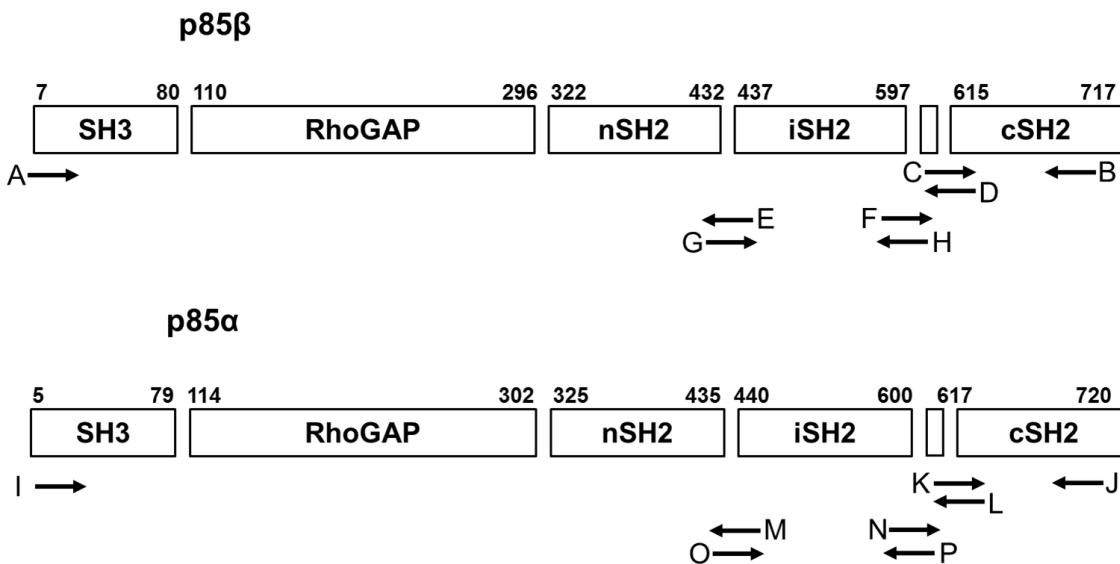

**Supplementary Figure 1: Location of primers.** The figure shows the positions of the primers listed in Table S2.

For Supplementary Tables see in Supplementary Files.
